# Supplementary material for: Cell–cell adhesion accounts for the different orientation of columnar and hepatocytic cell divisions
Source: PubMed Central journal article supplement — J Cell Biol. 2017 Nov 6;216(11):3847–59. doi: 10.1083/jcb.201608065 (PMC5674875; doi:10.1083/jcb.201608065), 2017-11-06
Supplement: JCB_201608065_sm.pdf [file JCB_201608065_sm.pdf]

Lázaro-Diéguez et al., <https://doi.org/10.1083/jcb.201608065>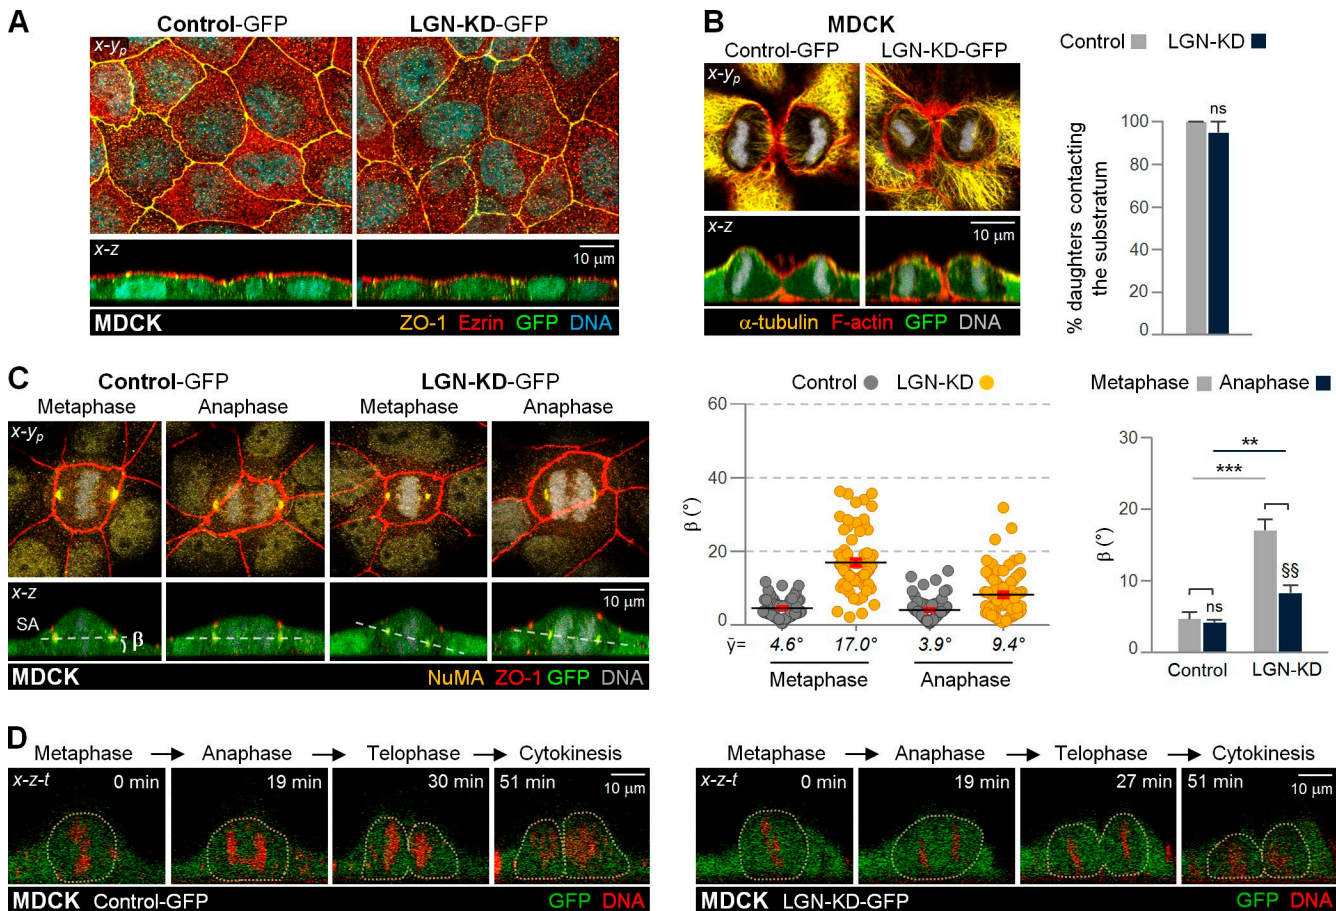

Figure S1. **Tilted metaphase spindles in LGN-depleted MDCK cells realign with the substratum during anaphase.** (A–C) Immunofluorescence analysis of control and LGN-KD MDCK monolayers (A), cytokinesis profiles with quantification of the percentage of daughter cells contacting the substratum (B), and metaphase or anaphase profiles with  $\beta$  angle quantification (C).  $n = 20$ – $25$  cells/experiment were analyzed for  $N = 3$  experiments. Error bars indicate  $\pm$ SEM (dot graph) or  $\pm$ SD (bar graphs). \*\*,  $P \leq 0.01$ ; \*\*\*,  $P \leq 0.001$ ; §§,  $P \leq 0.01$ ; ns, not significant, analyzed by  $t$  test. Note that parental control and LGN-KD cells express GFP. (D)  $x-z-t$  confocal time-lapse sequence of control and LGN-depleted MDCK dividing cells. Dotted lines show cell contours.

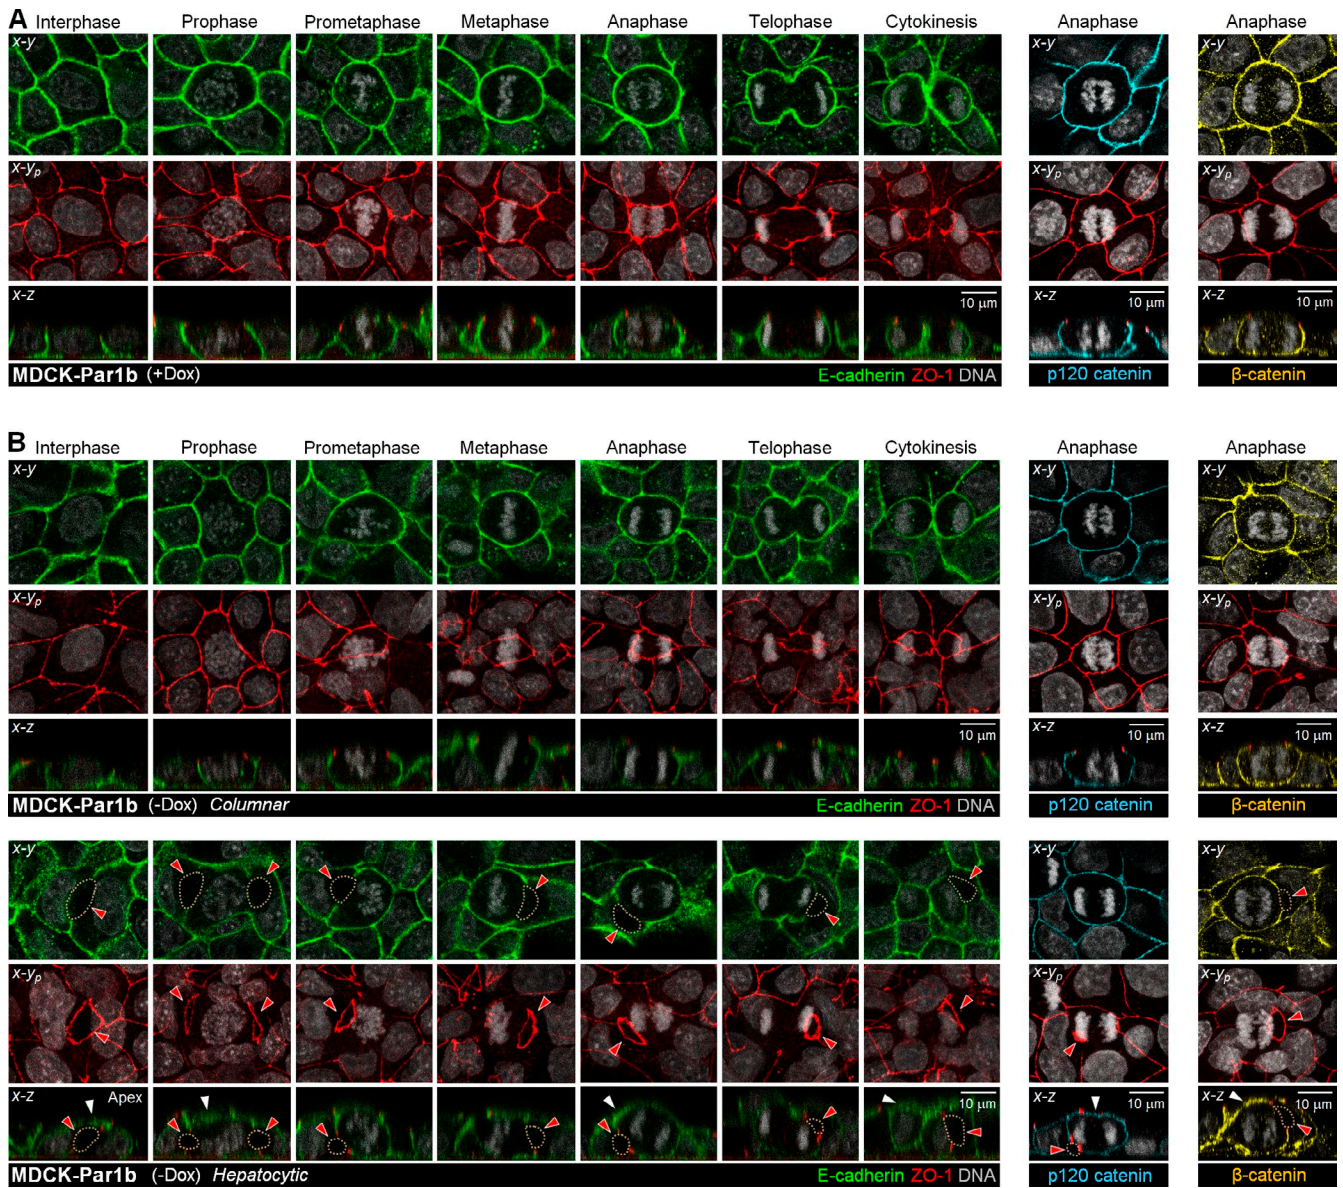

Figure S2. **Adherens junctions and TJs during mitosis in MDCK-Par1b cells.** (A and B) Confocal *x-y* and *x-z* sections and *x-y* projections (*x-y<sub>p</sub>*) of MDCK-Par1b cells either uninduced (+Dox) or overexpressing Par1b (-Dox) fixed and stained as indicated. (B) Arrowheads indicate E-cadherin, p120 catenin, or  $\beta$ -catenin at the cell apex (white) or the hepatocytic-like lateral lumina (red).

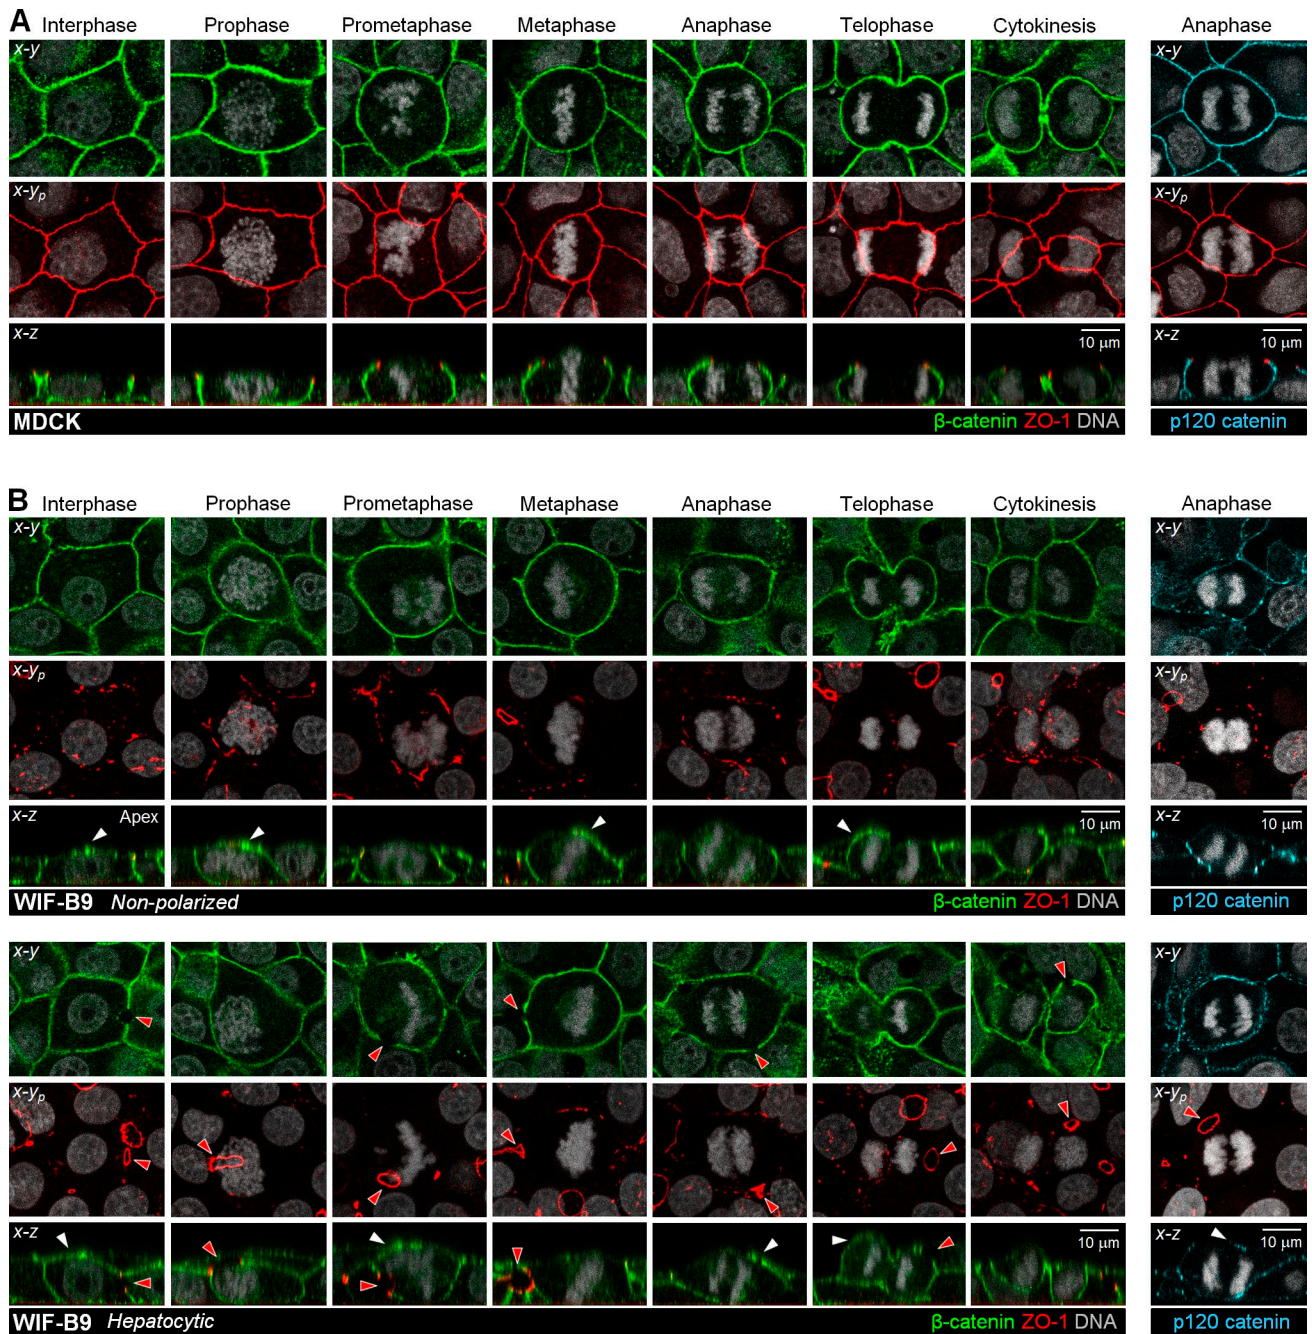

Figure S3. **Adherens junctions and TJs during mitosis in MDCK and WIF-B9 cells.** (A and B) Confocal x-y and x-z sections and x-y projections (x-y<sub>p</sub>) of MDCK and WIF-B9 cells fixed and stained as indicated. (B) Arrowheads indicate β-catenin and p120 catenin localization at the cell apex (white) or the hepatocytic lateral lumina (red).

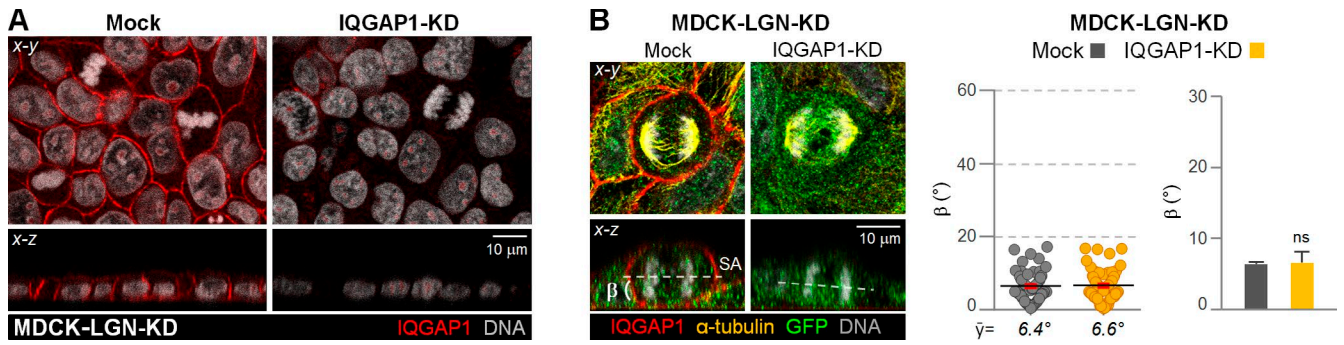

Figure S4. **E-cadherin binding partner IQGAP is not required for anaphase spindle realignment in LGN-KD cells.** Immunofluorescence analysis of LGN-KD (Mock) and LGN-IQGAP-KD double-depleted MDCK monolayers (A), and anaphase profiles with  $\beta$  angle quantification (B). Note that parental control and LGN-KD cells express GFP.  $n = 25$  cells/experiment were analyzed for  $N = 3$  independent experiments. Error bars indicate  $\pm$ SEM (dot graph) or  $+SD$  (bar graphs). ns, not significant, analyzed by  $t$  test.

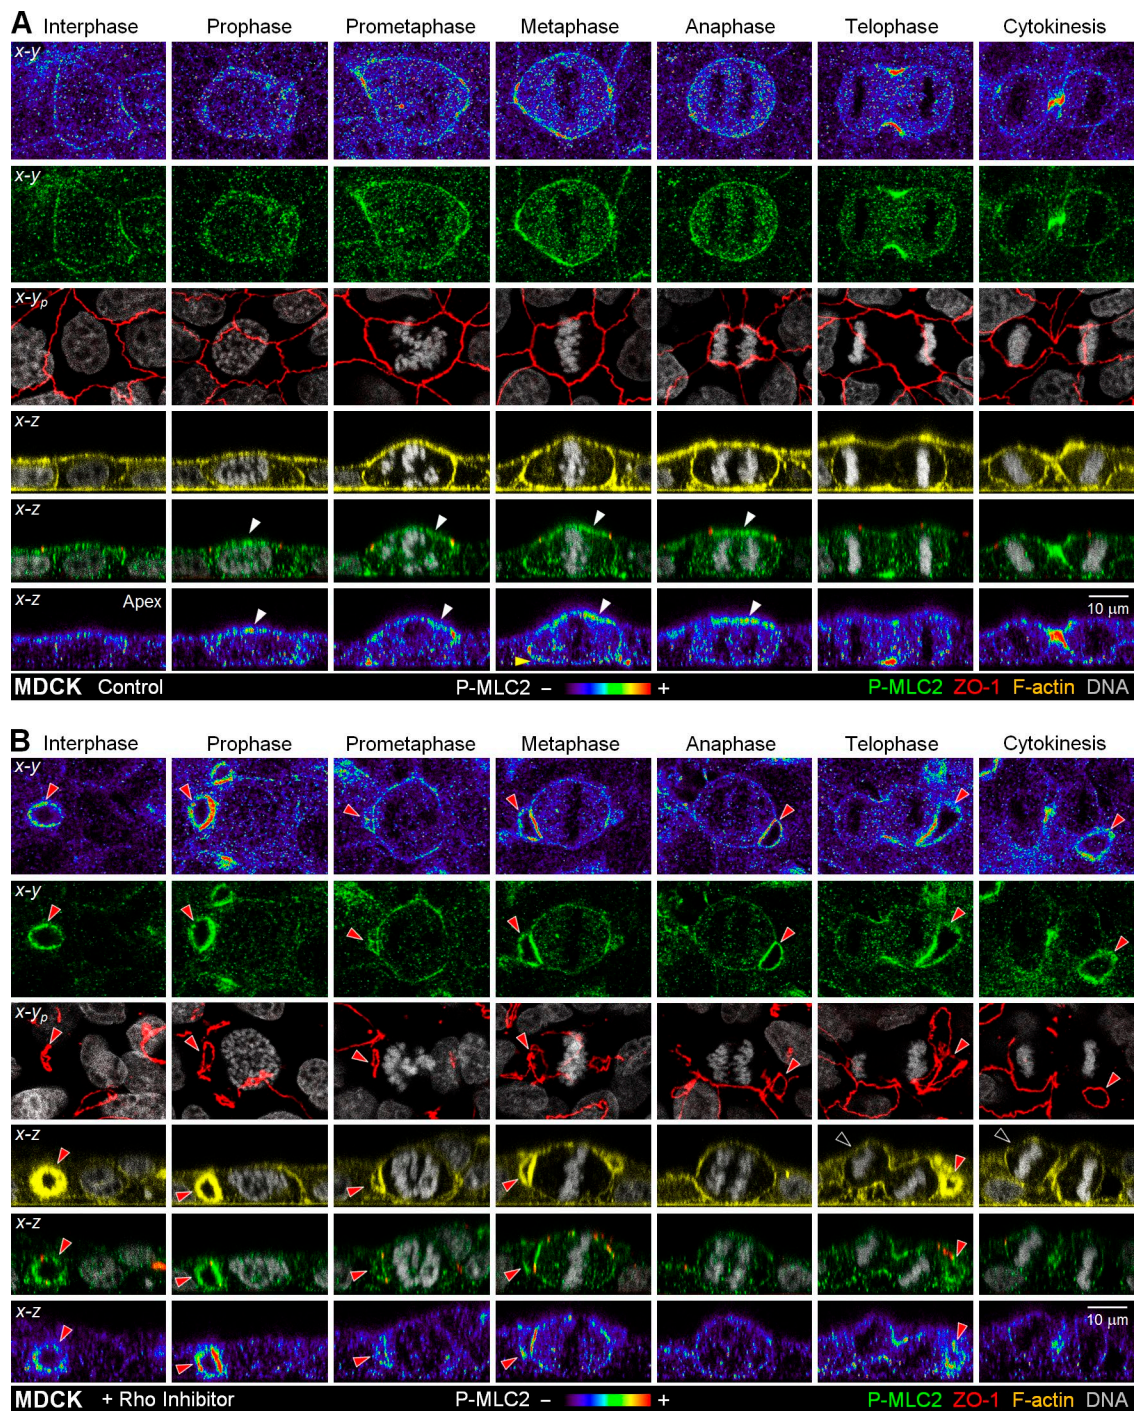

Figure S5. **Activated myosin II localization during mitosis in MDCK cells.** (A and B) Confocal *x-y* and *x-z* sections and *x-y* projections (*x-y<sub>p</sub>*) of untreated (A) or Rho inhibitor-treated (B) MDCK cells fixed and stained as indicated. The P-MLC2 intensity spectrum map for the *x-y* and *x-z* views is shown. Arrowheads indicate P-MLC2 at the cell apex in prophase to anaphase cells (white) and at the base in metaphase (yellow), the hepatocytic-like lateral lumina (red), or daughter that lost substrate contact (black).

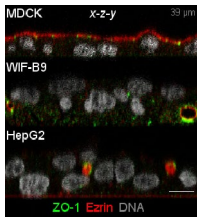

Video 1. **Hepatocyte-derived WIF-B9 and HepG2 cells form bilayers in 2D cell cultures.** Confocal x-z-y stacks (50 μm) of MDCK, WIF-B9, and HepG2 cells fixed and stained as indicated. Bar, 10 μm.

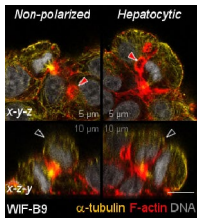

Video 2. **Cell divisions out of the monolayer in WIF-B9 cells.** Confocal x-y-z and x-z-y stacks of nonpolarized and hepatocytic WIF-B9 cells fixed and stained as indicated. Red arrowheads show hepatocytic lateral lumina. Black arrowheads show daughter that lost substrate contact. Bar, 10 μm.

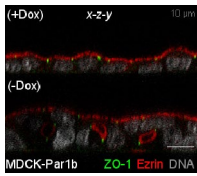

Video 3. **Par1b overexpression generates bilayers in MDCK cell cultures.** Confocal x-z-y stacks (50 μm) of uninduced (+Dox) or overexpressing Par1b (-Dox) MDCK-Par1b cells fixed and stained as indicated. Bar, 10 μm.

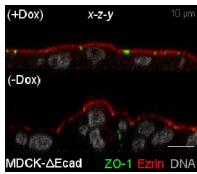

Video 4. **ΔEcad generates bilayers in MDCK cell cultures.** Confocal x-z-y stacks (50 μm) of uninduced (+Dox) or expressing ΔEcad (-Dox) MDCK-ΔEcad cells fixed and stained as indicated. Bar, 10 μm.

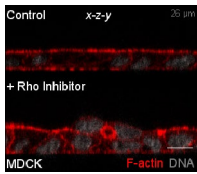

Video 5. **Rho inhibition promotes hepatocytic-type architecture in MDCK cell cultures.** Confocal x-z-y stacks (38 μm) of untreated cells (Control) or cells exposed to Rho inhibitor MDCK fixed and stained as indicated. Bar, 10 μm.

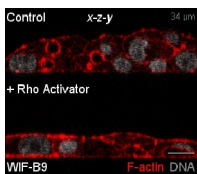

Video 6. **Rho activation promotes columnar-type architecture in WIF-B9 cell cultures.** Confocal x-z-y stacks (38 μm) of untreated cells (Control) or cells exposed to Rho activator WIF-B9 fixed and stained as indicated. Bar, 10 μm.
